# Supplementary material for: Estimating the impact of city-wide Aedes aegypti population control: An observational study in Iquitos, Peru
Source: PubMed Central journal article supplement (PMC6542505; doi:10.1371/journal.pntd.0007255), 2019-05-30

3D graph of Precipitation effect

A

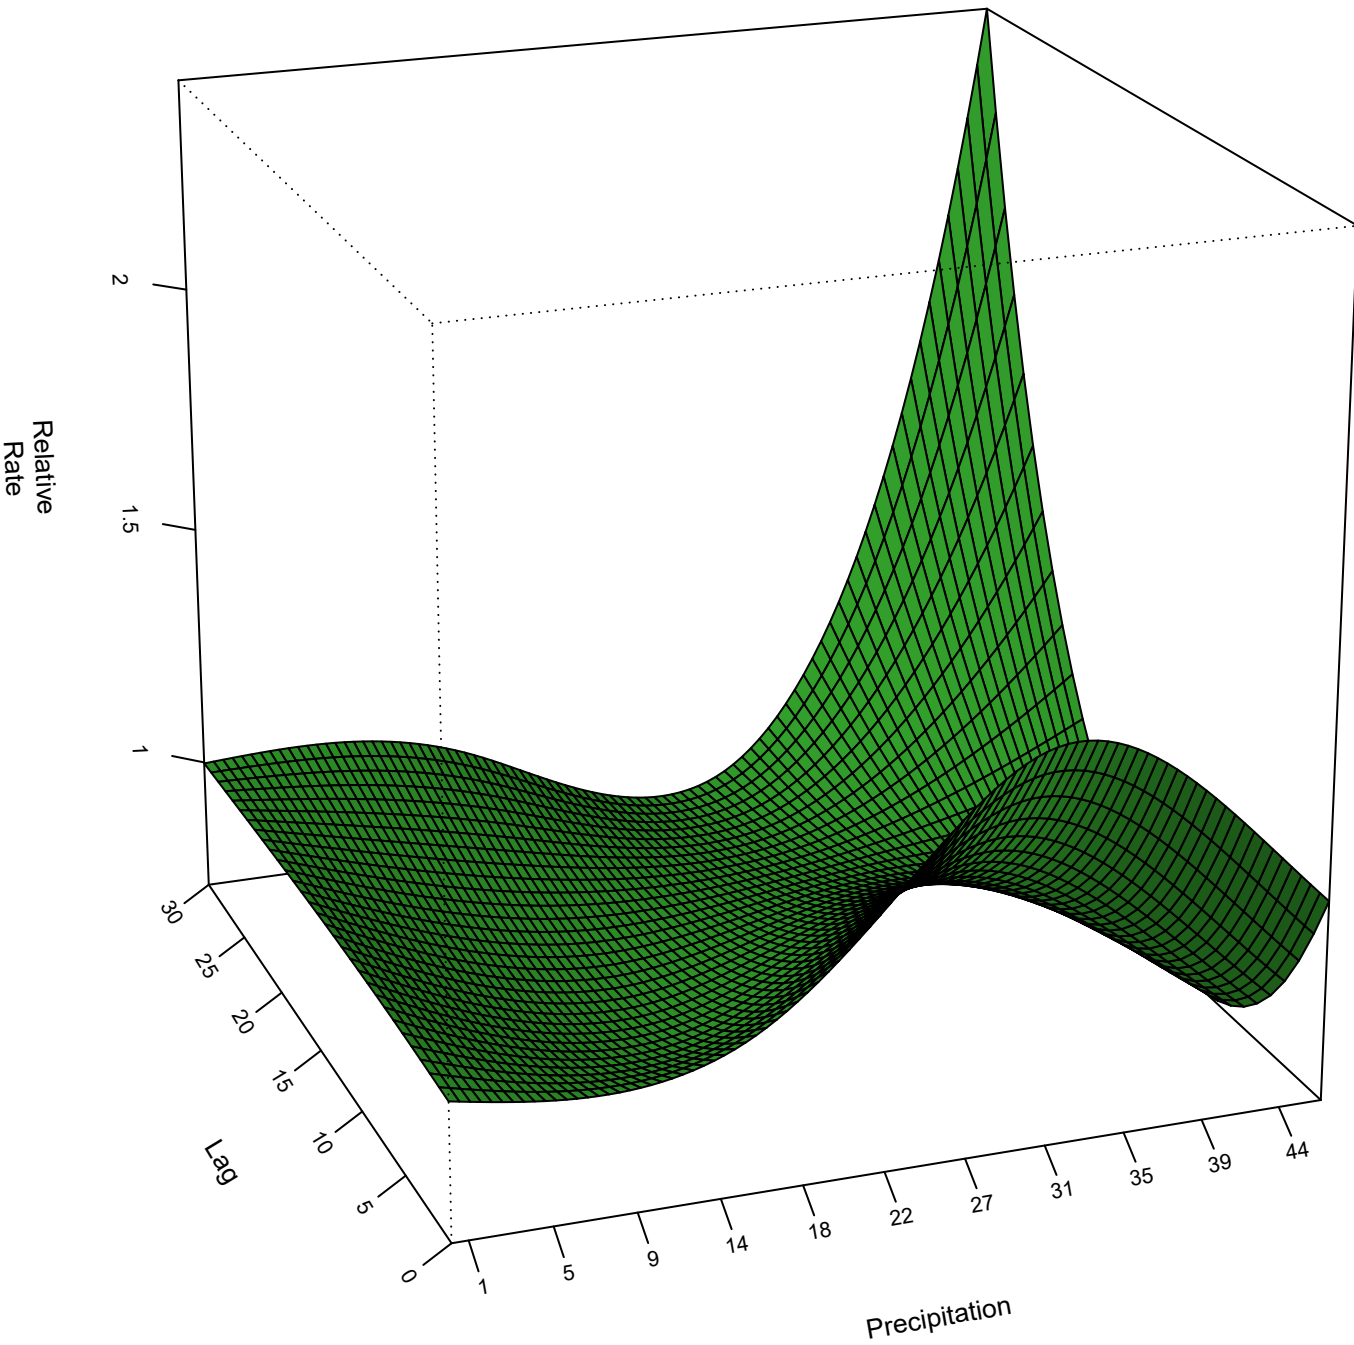

Slices in Precipitation dimension

B

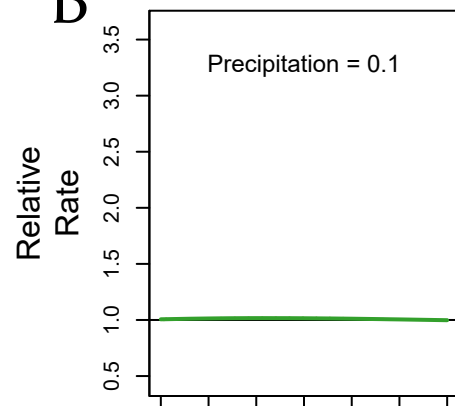

D

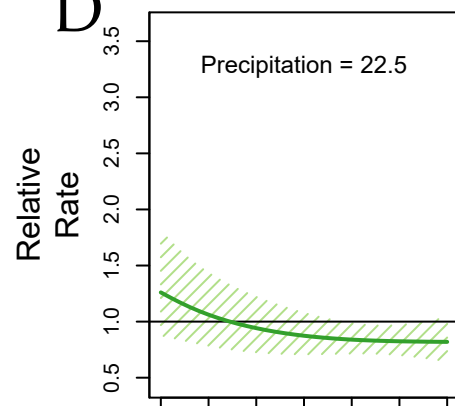

F

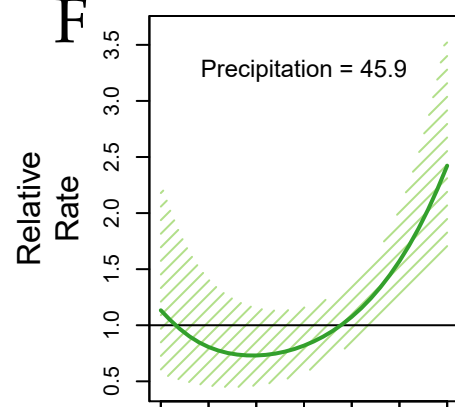

Slices in lag dimension

C

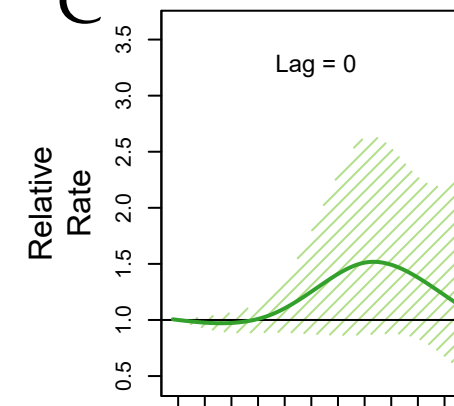

E

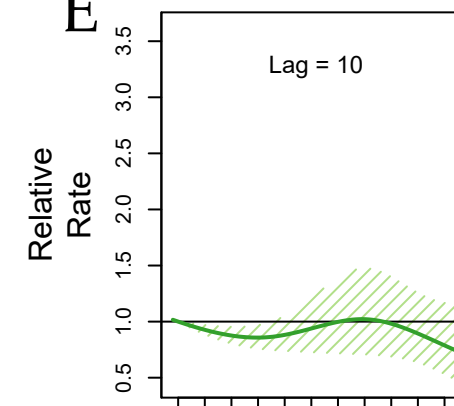

G

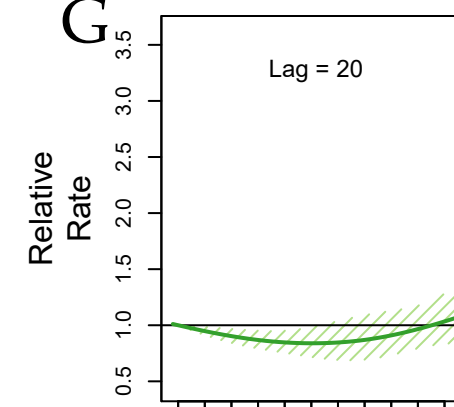

Supplement: pntd.0007255.s005.pdf [file pntd.0007255.s005.pdf]
