# Supplementary material for: Estimating the impact of city-wide Aedes aegypti population control: An observational study in Iquitos, Peru
Source: PubMed Central journal article supplement (PMC6542505; doi:10.1371/journal.pntd.0007255), 2019-05-30

3D graph of Daily Temperature Range effect

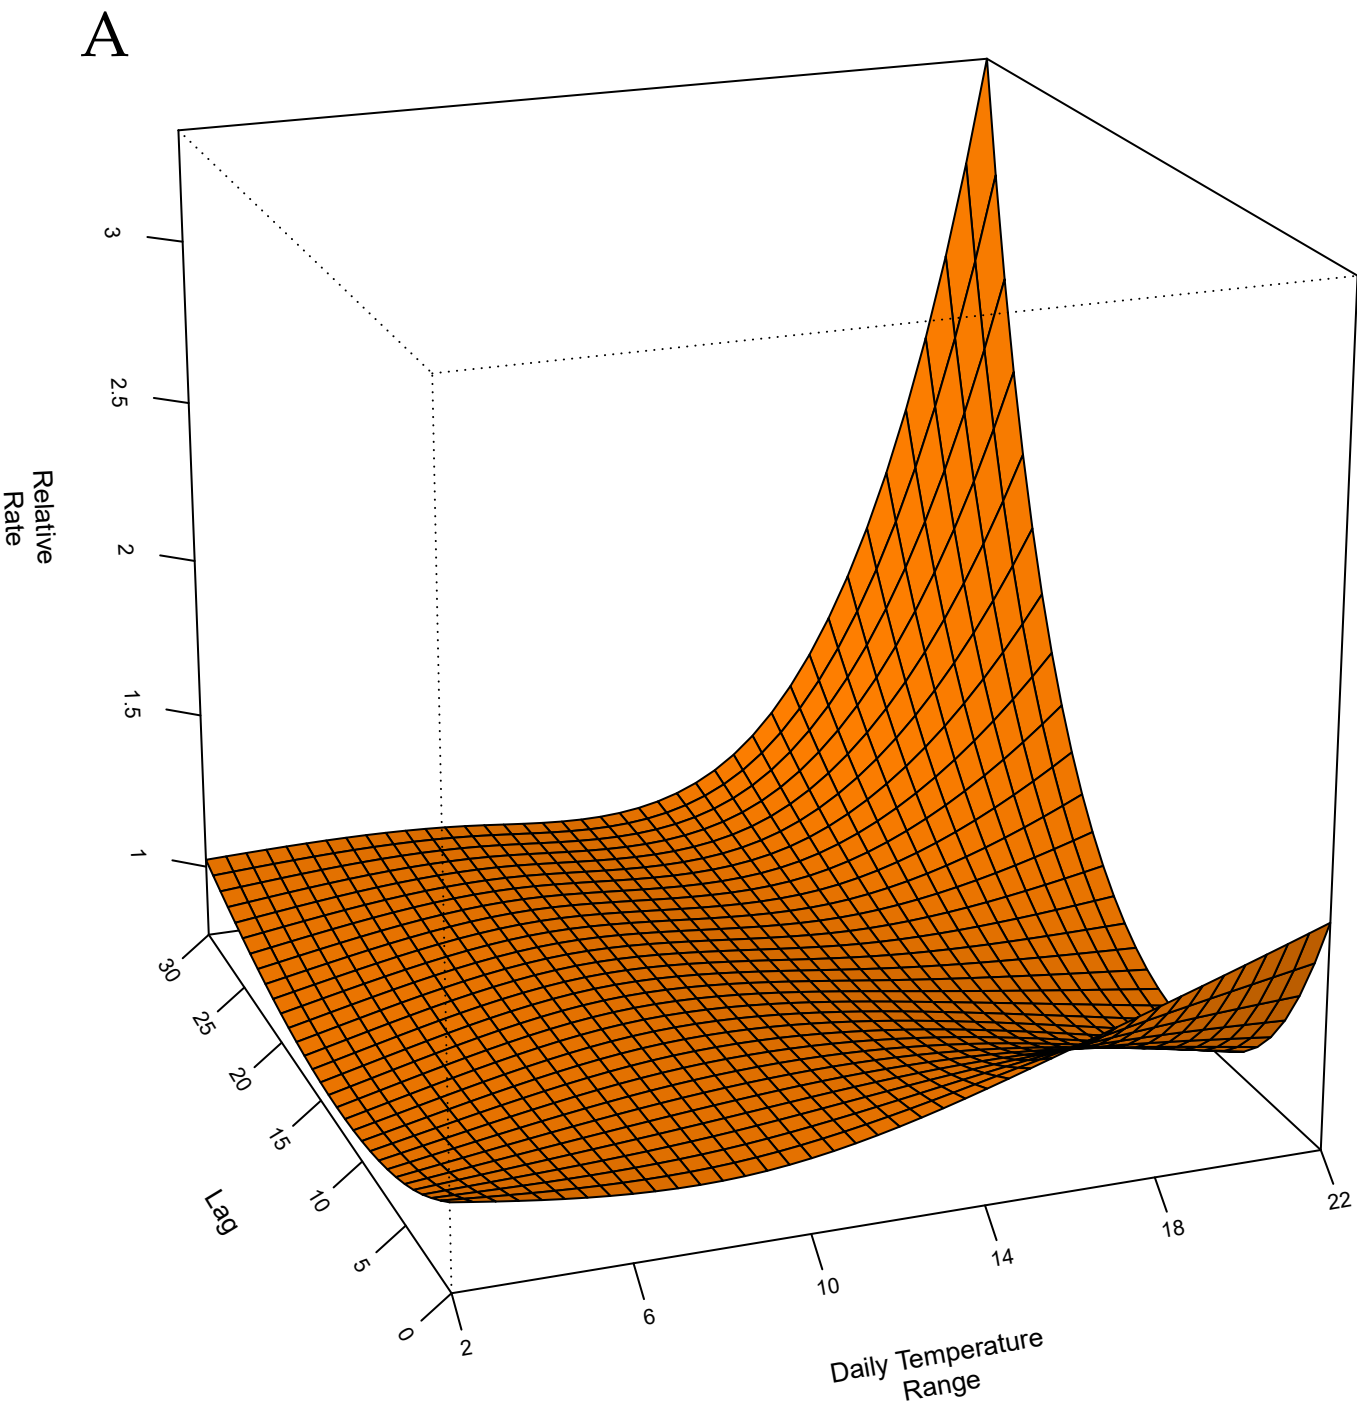

Slices in Daily Temperature Range dimension

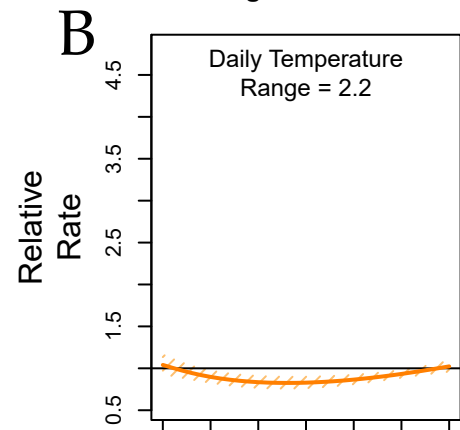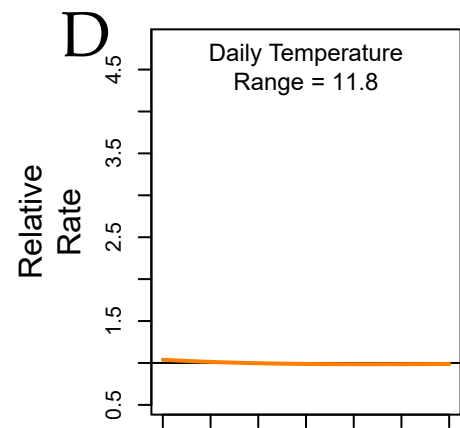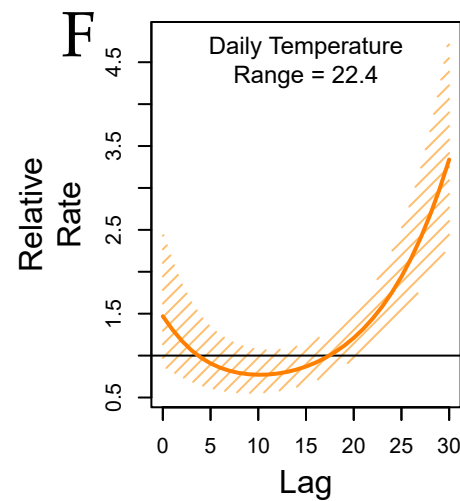

Slices in lag dimension

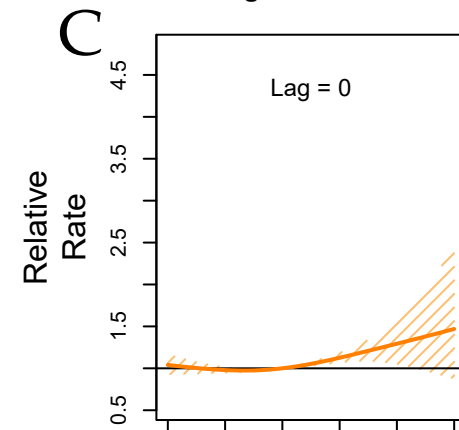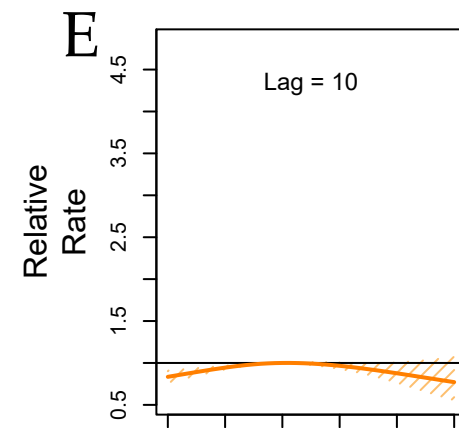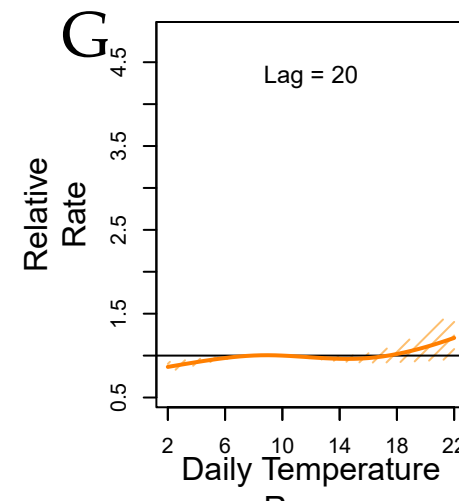

Supplement: pntd.0007255.s006.pdf [file pntd.0007255.s006.pdf]
