# Supplementary material for: Estimating the impact of city-wide Aedes aegypti population control: An observational study in Iquitos, Peru
Source: PubMed Central journal article supplement (PMC6542505; doi:10.1371/journal.pntd.0007255), 2019-05-30

**3D graph of Minimum Temperature effect**

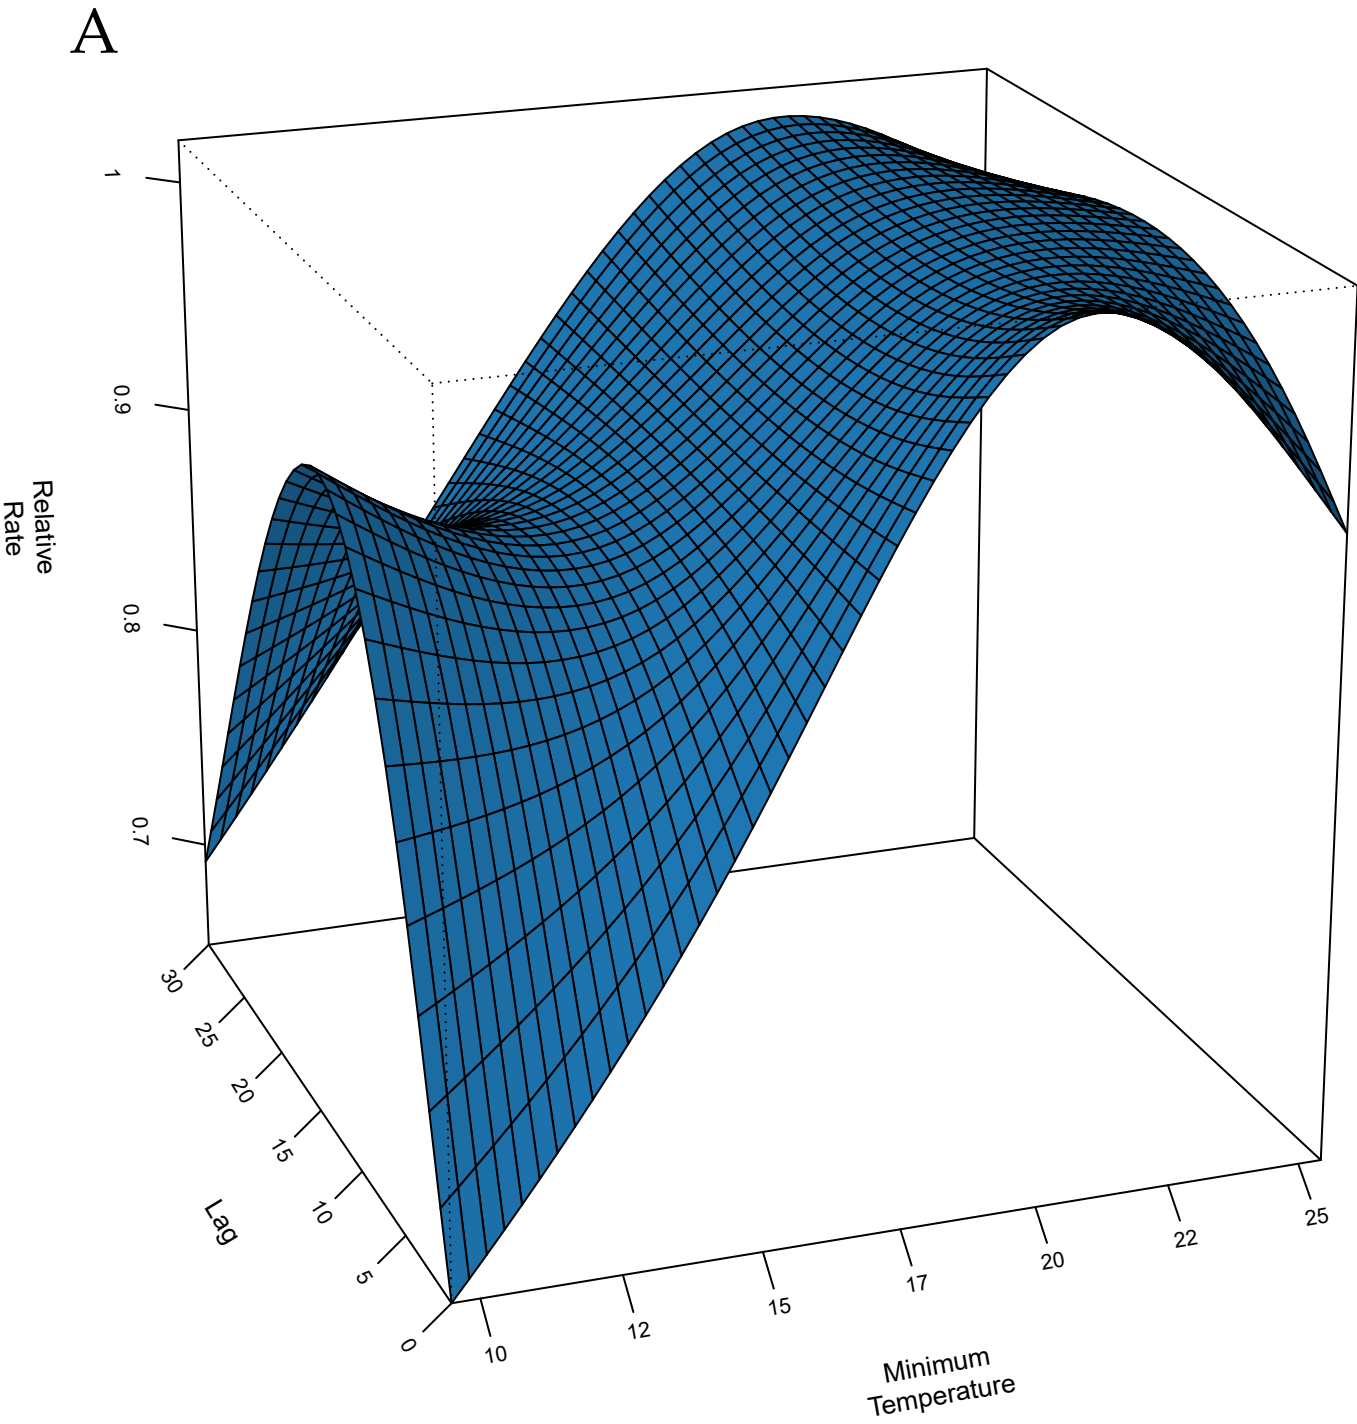

**Slices in Minimum Temperature dimension**

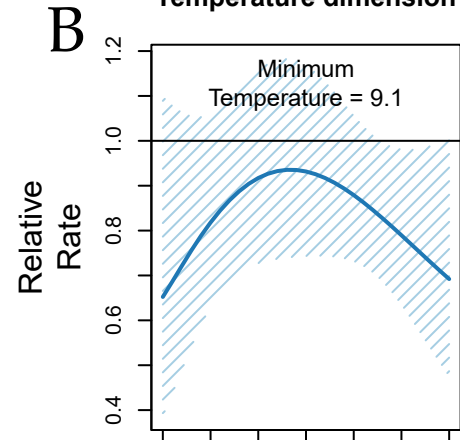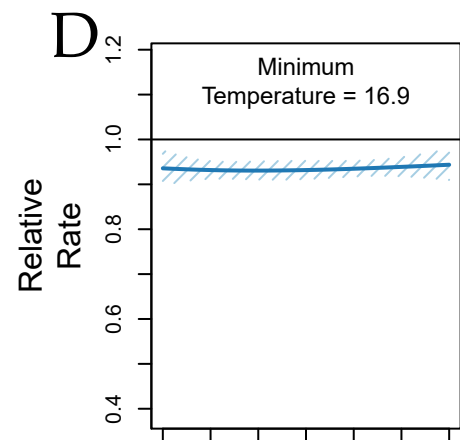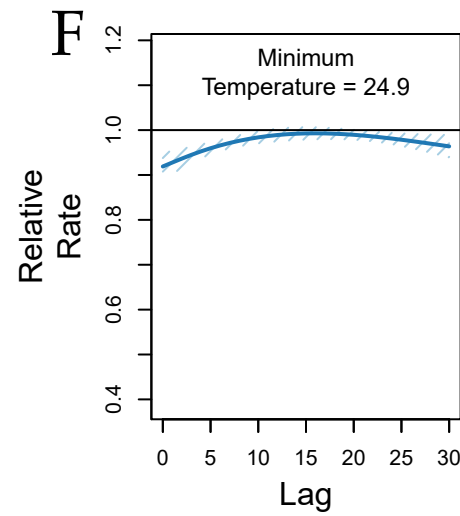

**Slices in lag dimension**

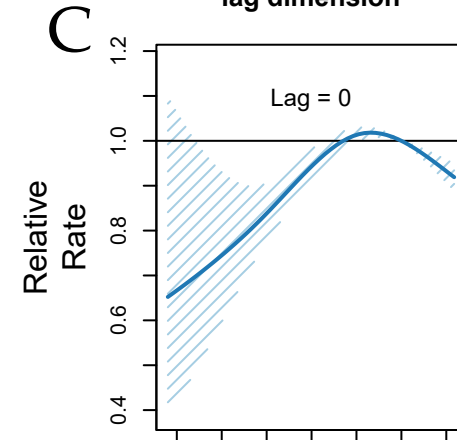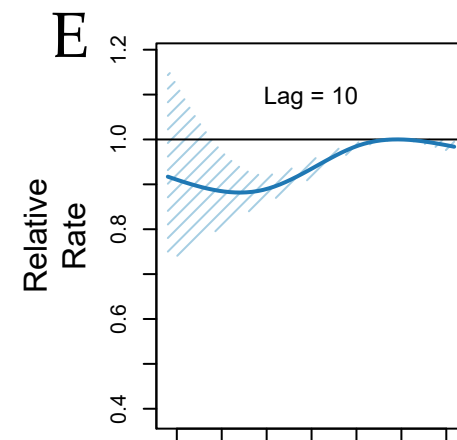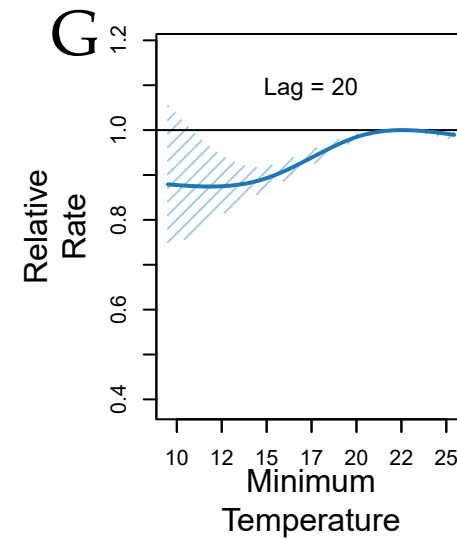

Supplement: pntd.0007255.s008.pdf [file pntd.0007255.s008.pdf]
