# Supplementary material for: Estimating the impact of city-wide Aedes aegypti population control: An observational study in Iquitos, Peru
Source: PubMed Central journal article supplement (PMC6542505; doi:10.1371/journal.pntd.0007255), 2019-05-30

**A** Estimated female AA found inside per visit 2001-04-28

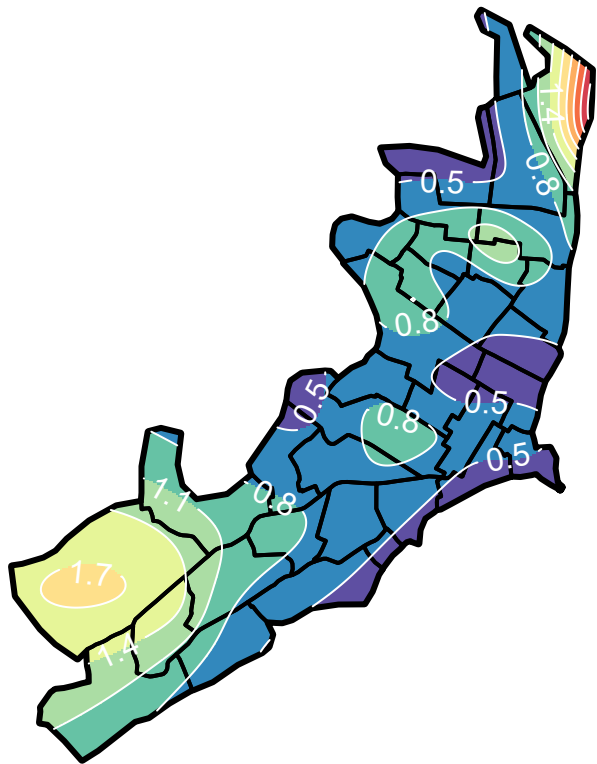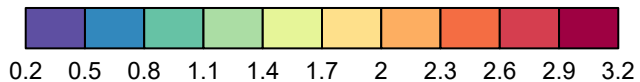

**B** Estimated coefficient of variation for 2001-04-28

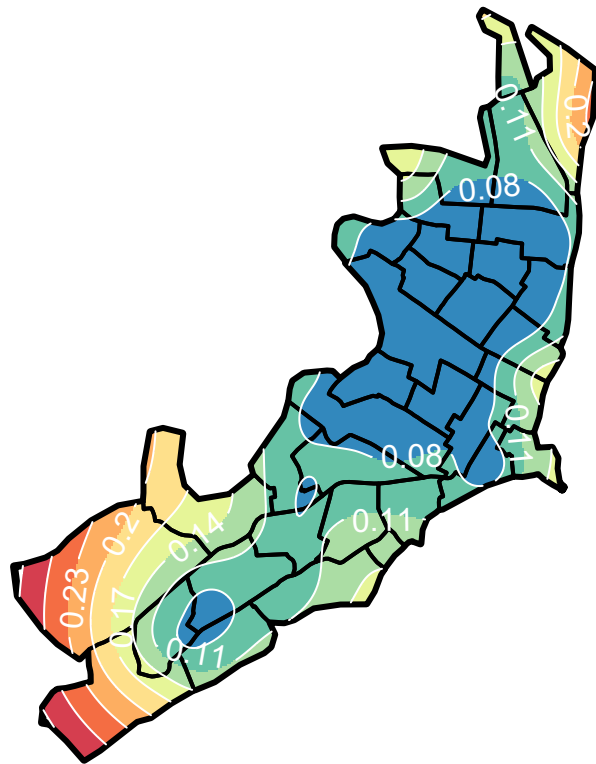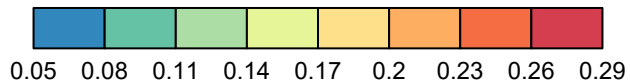

Supplement: pntd.0007255.s013.pdf [file pntd.0007255.s013.pdf]
