# Supplementary material for: Estimating the impact of city-wide Aedes aegypti population control: An observational study in Iquitos, Peru
Source: PubMed Central journal article supplement (PMC6542505; doi:10.1371/journal.pntd.0007255), 2019-05-30
Supplement: pntd.0007255.s015.pdf [file pntd.0007255.s015.pdf]

Log reduction of mosquito abundance under perfect space spray coverage

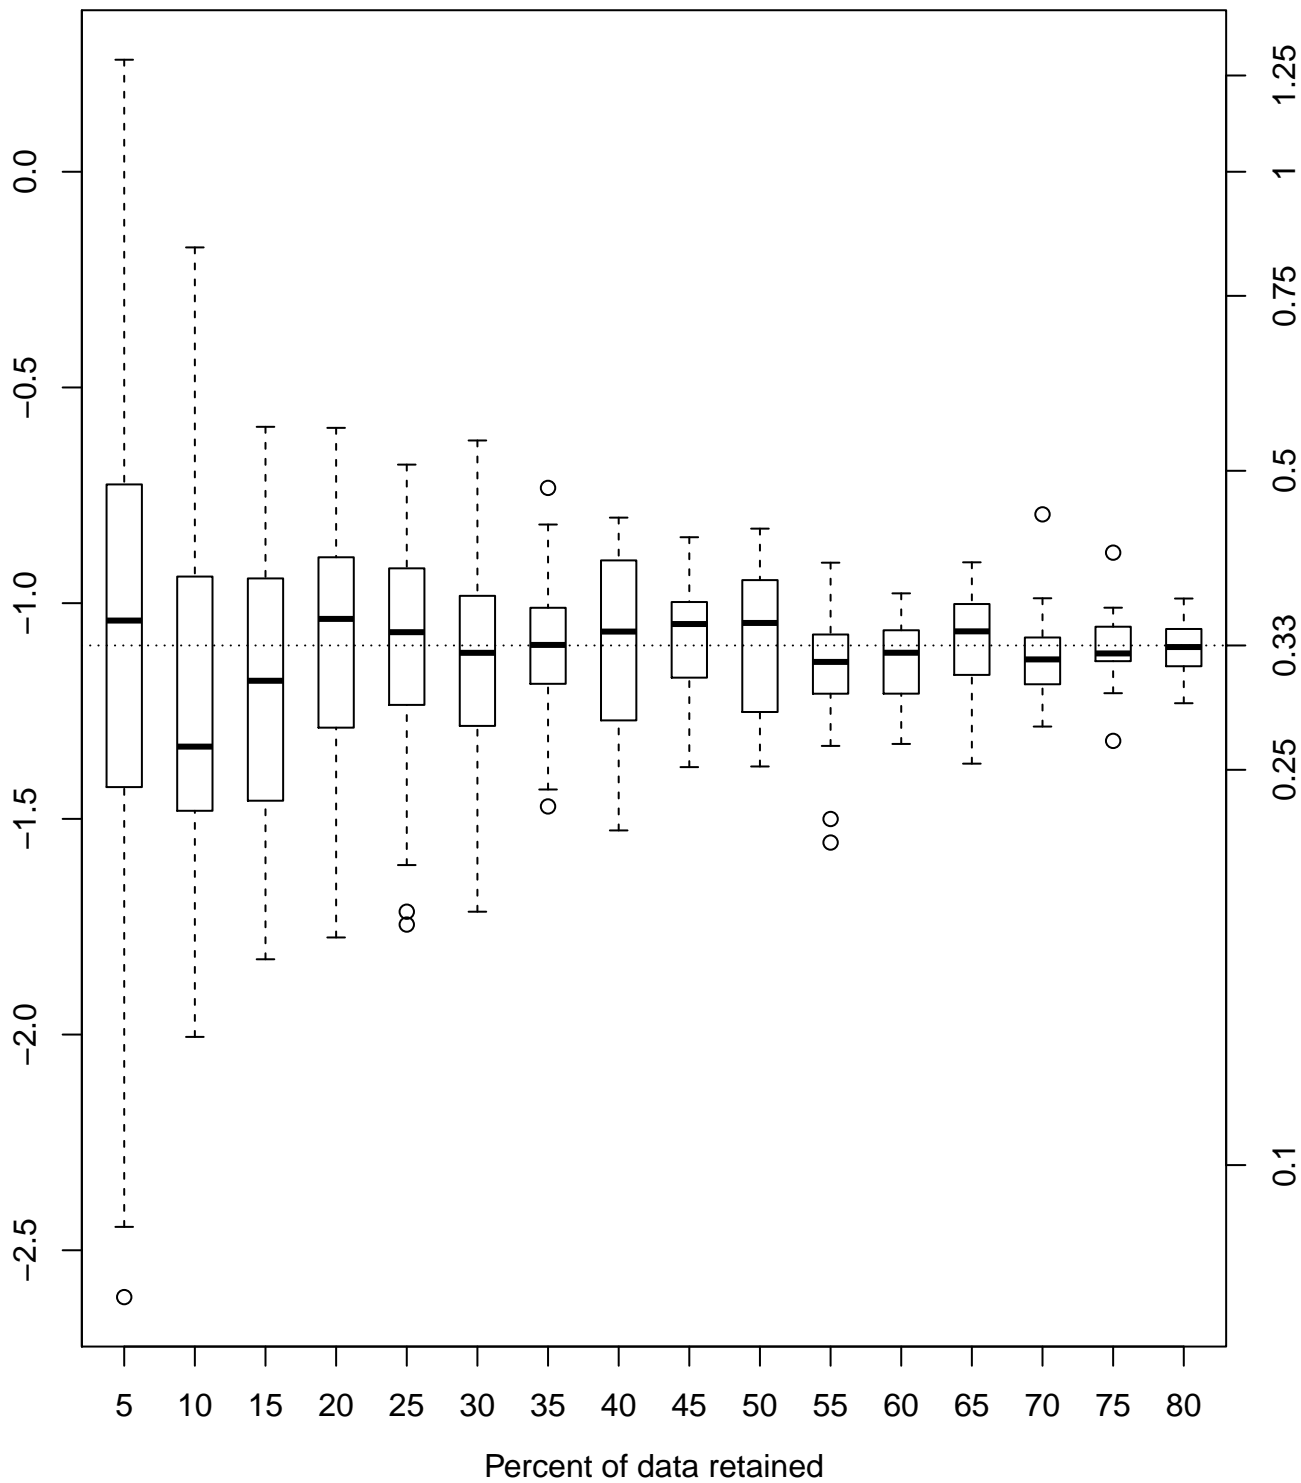

Reduction of mosquito abundance under perfect space spray coverage
